# Supplementary material for: I-motif-stapled and spacer-dependent multiple DNA nanostructures
Source: Royal Society of Chemistry journal article supplement (doi:10.1039/c6ra15201e), 2016-01-01

## Supporting Information for

### I-Motif-Stapled and Spacer-Dependent Multiple DNA Nanostructures

Jiangtao Ren<sup>‡a</sup>, Tianshu Wang<sup>‡a</sup>, Erkang Wang<sup>\*a</sup> and Jin Wang<sup>\*a, b</sup>

<sup>a</sup> State Key Laboratory of Electroanalytical Chemistry, Changchun Institute of Applied Chemistry, Chinese Academy of Sciences, Changchun, 130022, China

<sup>b</sup> Department of Chemistry and Physics, State University of New York at Stony Brook, New York, 11794, USA

\* To whom correspondence should be addressed. Tel: (+86)431-85262003; Email: E-mail: [ekwang@ciac.ac.cn](mailto:ekwang@ciac.ac.cn); [jin.wang.1@stonybrook.edu](mailto:jin.wang.1@stonybrook.edu);

<sup>‡</sup>These authors contributed equally to this work.

**Materials.** Ultrapage-purified oligonucleotides (Table S1) and tris(hydroxymethyl)aminomethane (Tris) were obtained from Sangon Biotechnology Co., Ltd (Shanghai, China). 3-Aminopropyltriethoxysilane (APTES) and ethidium bromide (EB) were purchased from Sigma-Aldrich (USA). Acrylamide, N, N'-Methylenebisacrylamide and ammonium persulfate ((NH<sub>4</sub>)<sub>2</sub>SO<sub>4</sub>) were obtained from Beijing Dingguochangsheng Biotechnology Co. Ltd (Beijing, China). Magnesium acetate (Mg(OAc)<sub>2</sub>) and Tetramethylethylenediamine (TEMED) were purchased from Beijing Chemical Works (Beijing, China) and AMRESCO Inc. (USA), respectively. 50 bp DNA ladder was purchased from New England Biolabs (Beijing), Ltd. The 6×loading buffer (pH=8.0 or 5.0) was prepared containing 25 mM Tris, 10 mM Mg(OAc)<sub>2</sub> and 36 % glycerol. TA buffer (pH=8.0 or 5.0) containing 25 mM Tris and 10 mM Mg(OAc)<sub>2</sub> was used for sample preparation and electrophoresis. Double distilled water was used throughout.

Table S1: The sequences of oligonucleotides used in this study.

| <i>Oligos</i> | <i>Sequence (5' to 3')</i>                |
|---------------|-------------------------------------------|
| C1S0          | ACTTAACTGCTAGCCGA CCCCCCTCCCCC            |
| C2S0          | TCGGCTAGCAGTGTAAGT CCCCCCTCCCCC           |
| C1S1          | ACTTAACTGCTAGCCGA T CCCCCCTCCCCC          |
| C2S1          | TCGGCTAGCAGTGTAAGT T CCCCCCTCCCCC         |
| C1S2          | ACTTAACTGCTAGCCGA TT CCCCCCTCCCCC         |
| C2S2          | TCGGCTAGCAGTGTAAG TTT CCCCCCTCCCCC        |
| C1S3          | ACTTAACTGCTAGCCGA TTT CCCCCCTCCCCC        |
| C2S3          | TCGGCTAGCAGTGTAAGT TTT CCCCCCTCCCCC       |
| C1S5          | ACTTAACTGCTAGCCGA TTTT CCCCCCTCCCCC       |
| C2S5          | TCGGCTAGCAGTGTAAGT TTTT CCCCCCTCCCCC      |
| C1S10         | ACTTAACTGCTAGCCGA TTTT TTTT CCCCCCTCCCCC  |
| C2S10         | TCGGCTAGCAGTGTAAGT TTTT TTTT CCCCCCTCCCCC |

Fig. S1: Typical AFM images and their corresponding cross-sections of multimers produced by mixing of C1S0 and C2S0. Scale bars are 200 nm.

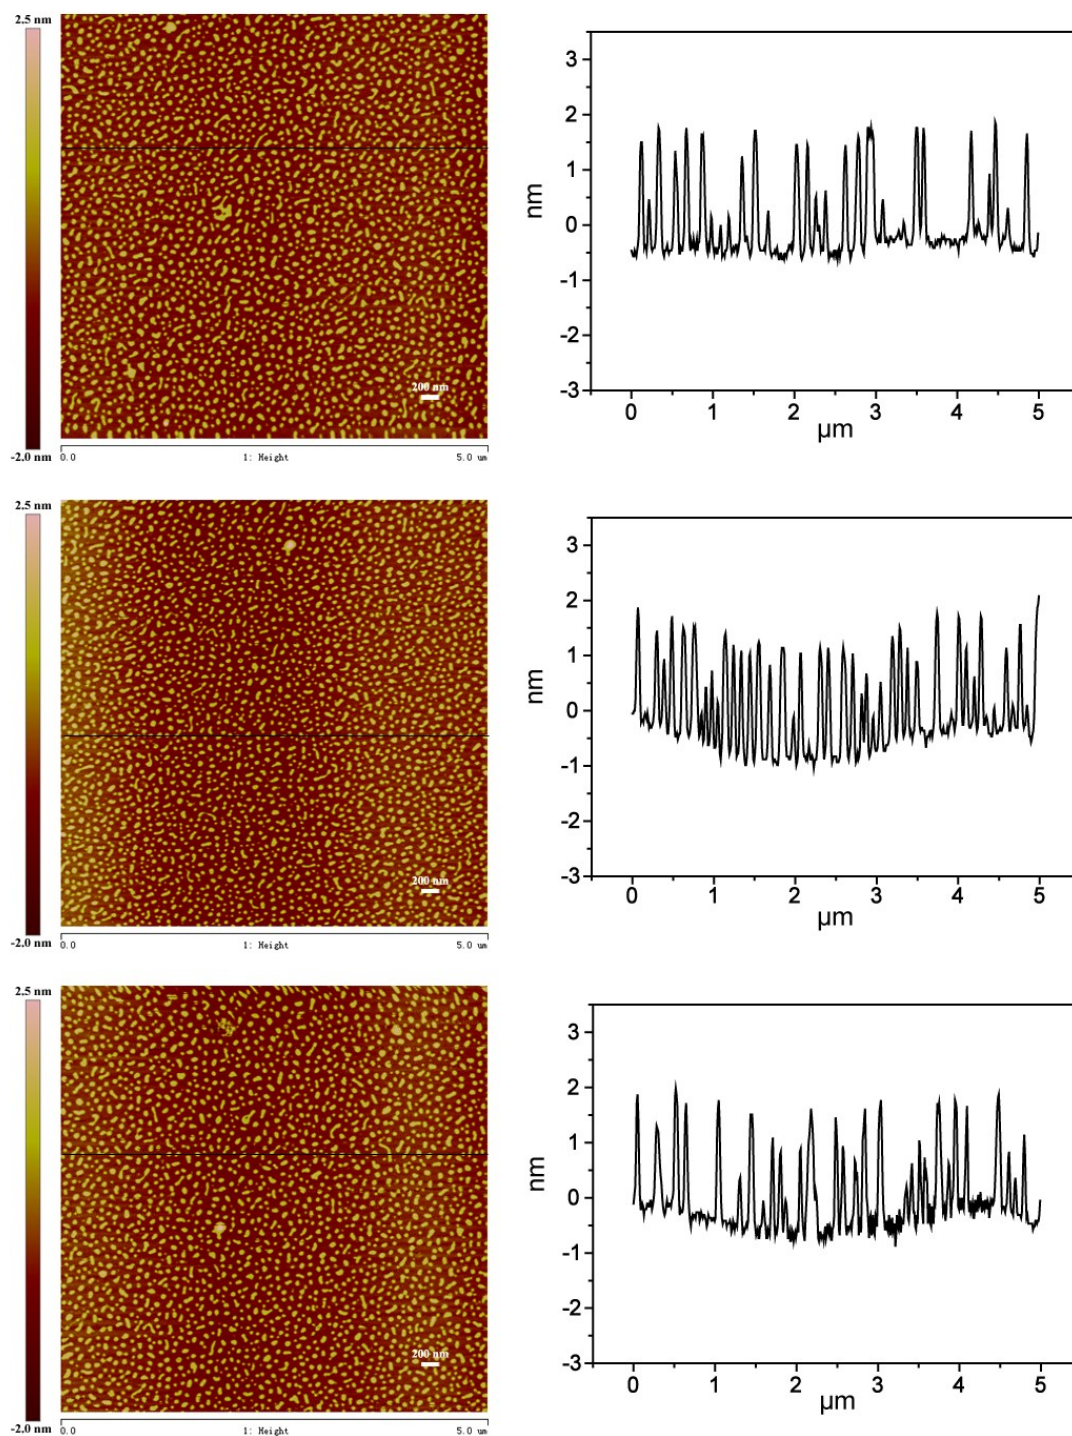

Fig. S2: Frequency distribution of length of multimer products produced from C1S0/C2S0.

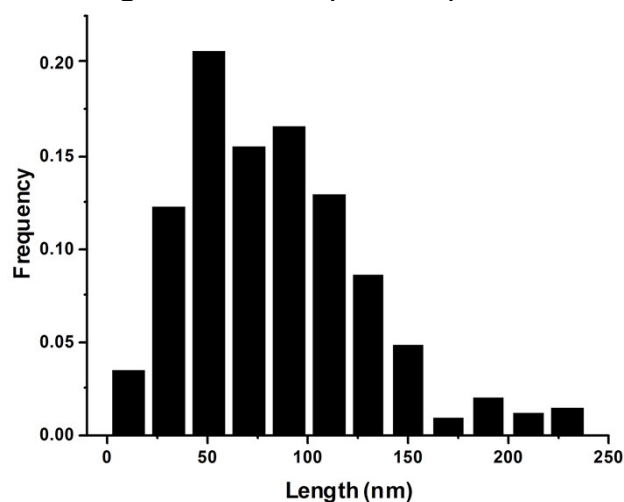

Fig. S3: (A) Native PAGE analysis of assembled products by mixing respectively annealed C1S0 and C2S0 at pH 5.0 (lane 3). Lanes 1 and 2 represent C1S0 and C2S0, respectively. (B) Native PAGE data of C1S10/C2S10 mixture (lane 6), for verifying formation of monomer structures. Lanes 4 and 5 represent C1S10 only and C2S10 only, respectively.

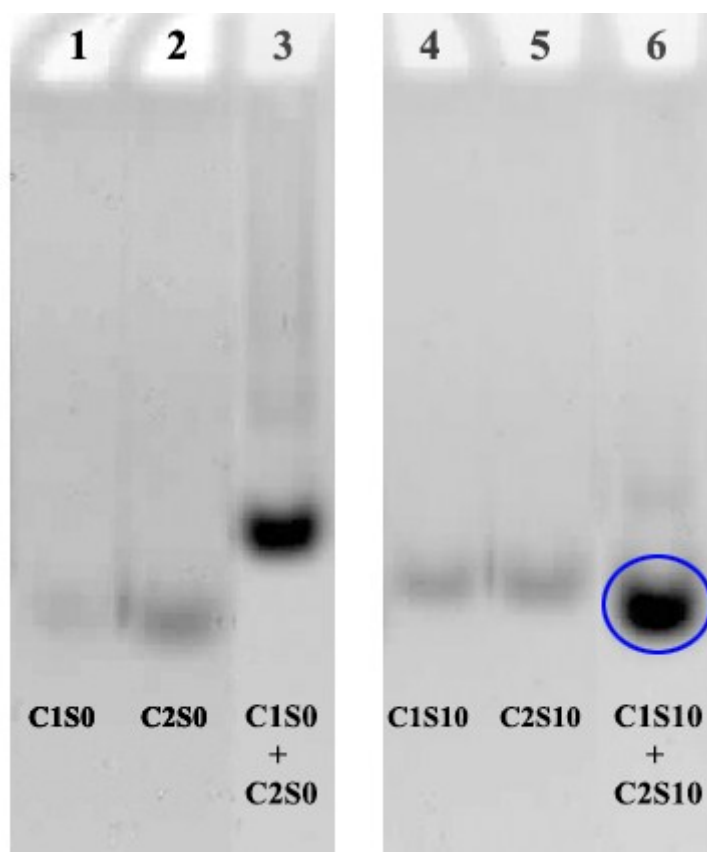

Fig. S4 The AFM images and their corresponding cross-sections of dimers produced from C1S2/C2S2 (A and B), and monomers produced from C1S10/C2S10 (C and D). Scale bars are 200 nm.

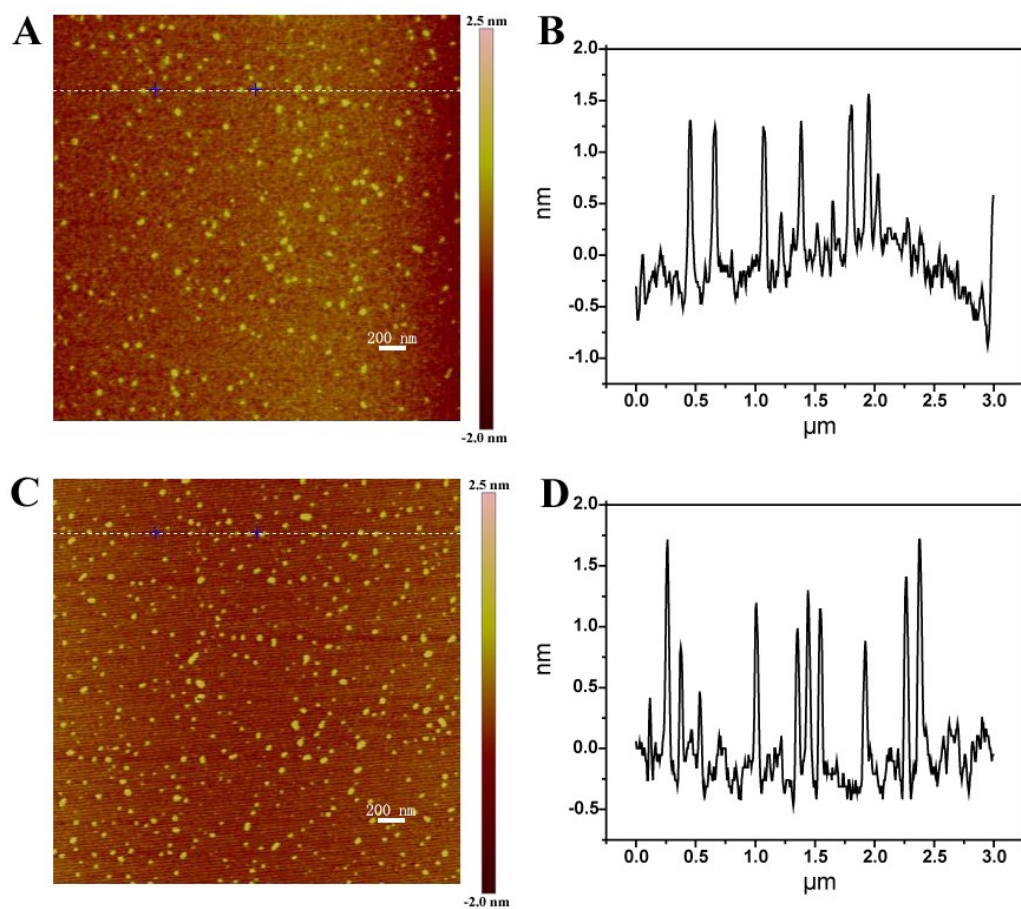

Fig S5: CD spectra of mixtures of C1S2/ C2S2 (A) and C1S5/ C2S5 (B) at pH 5 and pH 8, for demonstrating the formation of i-motif structures.

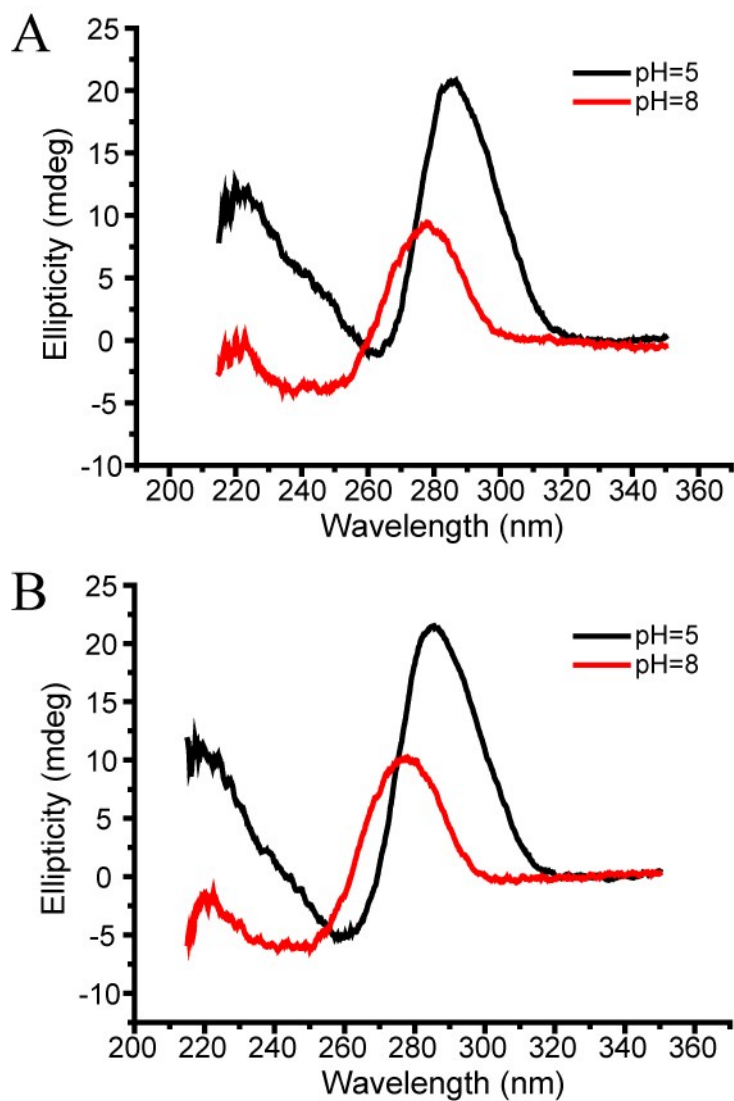

Supplement: c6ra15201e1.pdf [file c6ra15201e1.pdf]
